# Supplementary material
Source: publisher site journal article supplement (https://www.dovepress.com/article/587750)
Supplement: Supplementary file 1 [file 587750%20Revised%20Supplementary%20Table%201.docx]

**Supplement Table 1** Survey Questions

**Section 1: Sociodemographic Data**

1. **Your age:** …………….
2. **Your gender:**
   1. Female
   2. Male
   3. Prefer not to say
3. **Your educational background:**
   1. Bachelor's degree
   2. Master's degree
   3. Doctorate (PhD)
   4. Other (please specify): ………………
4. **Your professional experience:**
   1. ≤1 year
   2. 2–5 years
   3. 6–10 years
   4. 11–15 years
   5. ≥16 years
5. **Location of your pharmacy:**
   1. Neighborhood pharmacy
   2. Street-front pharmacy
   3. Pharmacy near a hospital or other healthcare facility
   4. Shopping mall pharmacy
   5. Other (please specify): ………………

**Section 2: Pharmacy Practices**

**A. Semaglutide**

1. On average, **how many people** visit your pharmacy each week to purchase or inquire about a medication containing the active ingredient semaglutide?

…………………………

2. On average, **how many boxes of medication** containing the active ingredient semaglutide are sold at your pharmacy each week?

………………………….

3. What reasons do patients indicate for using a medication containing the active ingredient semaglutide when they visit your pharmacy to purchase or inquire about it?

1. For the treatment of Type II diabetes
2. For weight loss purposes
3. Other (please specify): ………………

4. How do patients prefer to obtain a medication containing the active ingredient semaglutide when they visit your pharmacy to purchase or inquire about it?

1. With a prescription
2. Without a prescription
3. Other (please specify): ………………

5. How frequently do patients visit your pharmacy to purchase a medication containing the active ingredient semaglutide **without a prescription or without a doctor's recommendation**?

1. Always
2. Often
3. Sometimes
4. Rarely
5. Never

**B. Liraglutide**

1. On average, **how many people** visit your pharmacy each week to purchase or inquire about a medication containing the active ingredient liraglutide?

…………………………

2. On average, **how many boxes of medication** containing the active ingredient liraglutide are sold at your pharmacy each week?

………………………….

3. What reasons do patients indicate for using a medication containing the active ingredient liraglutide when they visit your pharmacy to purchase or inquire about it?

1. For the treatment of Type II diabetes
2. For weight loss purposes
3. Other (please specify): ………………

4. How do patients prefer to obtain a medication containing the active ingredient liraglutide when they visit your pharmacy to purchase or inquire about it?

1. With a prescription
2. Without a prescription
3. Other (please specify): ………………

5. How frequently do patients visit your pharmacy to purchase a medication containing the active ingredient liraglutide **without a prescription or without a doctor's recommendation**?

1. Always
2. Often
3. Sometimes
4. Rarely
5. Never

**C. Medication Procurement (5-Point Likert Scale)**

11. How frequently do you explain the **correct use** of the injection pen to your patients when providing semaglutide or liraglutide?

1. Always
2. Often
3. Sometimes
4. Rarely
5. Never

12. How frequently do you provide information to your patients regarding the **appropriate timing** for the injection pen when supplying semaglutide or liraglutide?

1. Always
2. Often
3. Sometimes
4. Rarely
5. Never

13. How frequently do you provide information to your patients about the proper **storage** conditions for the injection pen when supplying semaglutide or liraglutide?

1. Always
2. Often
3. Sometimes
4. Rarely
5. Never

14. How frequently do you inform your patients about the potential **side effects** of the medications when supplying semaglutide or liraglutide?

1. Always
2. Often
3. Sometimes
4. Rarely
5. Never

15. How frequently do you inquire about your patients' **other health conditions or medical issues** when supplying semaglutide or liraglutide?

1. Always
2. Often
3. Sometimes
4. Rarely
5. Never

**Section 3: Level of Knowledge**

1. Has the Food and Drug Administration (FDA) approved semaglutide (Ozempic®) as a weight loss agent?

1. Yes
2. No
3. I have no idea

2. Has the Food and Drug Administration (FDA) approved liraglutide (Saxenda®) as a weight loss agent?

1. Yes
2. No
3. I have no idea

3. Has the Ministry of Health of the Republic of Turkiye approved semaglutide (Ozempic®) as a weight loss agent?

1. Yes
2. No
3. I have no idea

4. Has the Ministry of Health of the Republic of Turkiye approved liraglutide (Saxenda®) as a weight loss agent?

1. Yes
2. No
3. I have no idea

5. Which of the following drug class does semaglutide belong to?

1. Thiazolidinediones
2. GLP-1 receptor agonist
3. DPP-4 inhibitor
4. I have no idea
5. Other (please specify) ……………….

6. Which of the following drug class does liraglutide belong to?

1. Thiazolidinediones
2. GLP-1 receptor agonist
3. DPP-4 inhibitor
4. I have no idea
5. Other (please specify) ……………….

7. What is the recommended starting daily dose of liraglutide for weight loss?

1. 0.2 mg
2. 0.6 mg
3. 1.2 mg
4. 2.5 mg
5. I have no idea

8. What is the recommended starting weekly dose of semaglutide for weight loss?

1. 0.25 mg
2. 0.5 mg
3. 1.0 mg
4. 2.0 mg
5. I have no idea

9. What is the maximum daily dose of liraglutide used for weight loss?

1. 0.4 mg
2. 1.2 mg
3. 2.4 mg
4. 3.0 mg
5. I have no idea

10. What is the maximum weekly dose of semaglutide used for weight loss?

1. 0.4 mg
2. 1.2 mg
3. 2.4 mg
4. 3.0 mg
5. I have no idea

 11. The dose of liraglutide should be increased weekly according to a fixed escalation plan.

1. Yes
2. No
3. I have no idea

12. The dose of semaglutide should be increased weekly according to a fixed escalation plan.

1. Yes
2. No
3. I have no idea

13. The dose of liraglutide or semaglutide should be administered subcutaneously in the abdomen, thigh, or upper arm.

1. Yes
2. No
3. I have no idea

14. The semaglutide dose should be administered once a week on the same day every week.

1. Yes
2. No
3. I have no idea

15. Liraglutide or semaglutide should be administered immediately after meals.

1. Yes
2. No
3. I have no idea

16. Liraglutide or semaglutide may be initiated in overweight patients without considering their BMI.

1. Yes
2. No
3. I have no idea

17. If a dose of liraglutide is missed and a delay of 18 hours occurs, the next planned dose should be administered; no extra or higher doses should be given.

1. Yes
2. No
3. I have no idea

18. Unused injectable pens should be stored at room temperature (25°C).

1. Yes
2. No
3. I have no idea

19. Used injectable pens should be stored at room temperature (25°C).

1. Yes
2. No
3. I have no idea

20. Used liraglutide-containing injectable pens should be discarded 30 days after the first use.

1. Yes
2. No
3. I have no idea

21. Used semaglutide-containing injectable pens should be discarded 15 days after the first use.

1. Yes
2. No
3. I have no idea

22. Both liraglutide and semaglutide are contraindicated in patients with multiple endocrine neoplasia.

1. Yes
2. No
3. I have no idea

23. One of the most common side effects associated with these medications is nausea.

1. Yes
2. No
3. I have no idea

24. The use of liraglutide and semaglutide during pregnancy is considered safe.

1. Yes
2. No
3. I have no idea

25. The use of liraglutide and semaglutide during breastfeeding is considered safe.

1. Yes
2. No
3. I have no idea

**Section 4: Misuse**

1. Do you think that semaglutide-containing medication is being misused?

1. Yes
2. No
3. Other (please specify) ………………..

2. Do you think that liraglutide-containing medication is being misused?

1. Yes
2. No
3. Other (please specify) ………………..

3. Have your patients expressed that they are attempting to obtain semaglutide or liraglutide-containing medications through illegal means (e.g., internet)?

1. Yes
2. No
3. Other (please specify) ……………….

Additional comments or insights you would like to share regarding the topic: ………………..
